# Supplementary material
Source: Elsevier journal article supplement (https://www.sciencedirect.com/science/article/pii/S0001731021002362)
Supplement: mmc1 [file S0001731021002362:mmc1.pdf]

## MATERIAL SUPLEMENTARIO

### Anexo 1.

#### Materiales y métodos

Se realizó un estudio observacional de casos y controles retrospectivo, con apareamiento por frecuencia utilizando las variables género y edad. La recolección de la información se hizo de forma retro-prospectiva, en el periodo comprendido entre mayo de 2014 y octubre de 2017. El estudio inició en Agosto de 2016, por lo tanto hubo pacientes incidentes (diagnosticados en ese periodo) y prevalentes ( diagnosticados antes del periodo de estudio, y valorados en consulta durante el periodo de estudio).

Los casos fueron definidos como pacientes con diagnóstico de melanoma, in situ o invasor, confirmado por histopatología. Los controles fueron pacientes sin antecedente personal de melanoma que consultaban por cualquier causa dermatológica. La relación caso:control fue de 1:2. Se incluyeron las historias clínicas de pacientes mayores de 18 años que consultaron al servicio de dermatología de Aurora Centro Especializado en Cáncer de Piel en la ciudad de Medellín, Colombia, en el período comprendido entre mayo de 2014 y octubre de 2017. Los controles fueron seleccionados aleatoriamente de la base de datos de la clínica, los cuales asistían a la institución a consultar por cualquier causa dermatológica, excepto con diagnóstico de melanoma cutáneo. Se excluyeron solamente los pacientes menores de 18 años. El proyecto fue avalado por el Comité de Ética de Investigación en Salud de la Universidad Pontificia Bolivariana en Medellín, Colombia.

Se analizaron *variables socio-demográficas*, incluyendo edad, género, lugar de nacimiento y de residencia, nivel de educación, régimen de seguridad social, estado civil; *variables clínicas* como fototipo según Fitzpatrick, color de pelo y ojos, efélides, número total de nevus comunes, número de nevus en tronco y extremidades superiores, patrón dermatoscópico predominante en los nevus (reticular difuso, reticular parcheado, reticular periférico con hipopigmentación central, reticular periférico con hiperpigmentación central, reticular periférico con glóbulos centrales, patrón homogéneo, glóbulos periféricos, patrón globular, dos componentes o multicomponente), número de nevus displásicos/atípicos, presencia de nevus melanocítico congénito, fotodaño, antecedente personal o familiar de cáncer de piel melanoma o no melanoma; antecedentes de otro tipo de cáncer, inmunosupresión, genodermatosis, enfermedad de Parkinson, e historia familiar de melanoma.

Aurora Centro Especializado en Cáncer de Piel (ACCP), tiene un formato en cada historia clínica independiente del motivo de consulta en el cual se interroga por la mayoría de variables del estudio, incluido el número de nevus y patrón dermatoscópico predominante. En caso de no tener registro en la historia clínica la información fue recopilada de la base de datos de fotografías de alta resolución de la institución, tanto clínicas como dermatoscópicas

Para el conteo de nevus y las variables dermatoscópicas se usaron las imágenes clínicas y dermatoscópicas, almacenadas en los sistemas DermaGraphix® (Canfield Scientific, New Jersey, EU) y/o FotoFinder ATBM® (FotoFinder Systems GmbH, Alemania), obtenidas con los sistemas VEOS<sup>DS3</sup> (Canfield Scientific, New Jersey, EU) y/o Medicam® (FotoFinder Systems GmbH, Alemania).

**Tamaño de muestra.** Se estimó una muestra de 62 casos de melanoma y 125 controles. Para su cálculo se utilizó un error alfa de 5%, error beta de 20% (confianza del 95%, potencia del 80%) y un odds ratio (OR) de 3 asociado a múltiples nevus melanocíticos como principal factor de riesgo de melanoma. Se utilizó el programa estadístico Epi-info 7 para la estimación del tamaño muestral.

#### **Análisis estadístico.**

Se realizó un análisis univariado de las variables cuantitativas con media y desviación estándar (DS) o mediana y rangos intercuantiles en caso de valores extremos. Para las variables cualitativas se usaron frecuencias absolutas y relativas. Se realizó análisis bivariado usando la prueba estadísticas de chi cuadrado y/o test exacto de Fisher. En las variables politómicas se usó regresión logística. Posteriormente se realizó un análisis multivariado usando un modelo de regresión logística múltiple, cuya variable dependiente fue la condición de ser caso/control y las variables independientes aquellas cuyo valor *p* en la asociación bivariada fuese menor a 0.25 con el test de bondad de ajuste de Hosmer Lemeshow. El análisis estadístico se realizó con el software SPSS® 22.0 (SPSS Inc., Chicago 2001) para Windows (Microsoft®).

definición y categorización de las variables del estudio.

**Tabla 1. Variables socio-demográficas.**

| Variable                                                                                                                                | Definición                                                      |
|-----------------------------------------------------------------------------------------------------------------------------------------|-----------------------------------------------------------------|
| Edad                                                                                                                                    | Tiempo que ha vivido una persona (Diccionario RAE 22º edición). |
| Sexo                                                                                                                                    | Condición orgánica masculina o femenina.                        |
| Lugar de residencia                                                                                                                     | País y ciudad donde habita el participante.                     |
| Nivel de educación                                                                                                                      | Última formación académica realizada.                           |
| Régimen de seguridad social                                                                                                             | Régimen de seguridad social.                                    |
| Estado civil                                                                                                                            | Situación de convivencia.                                       |
| * Todas estas variables se extrajeron del registro de admisión de la historia clínica y fue rectificada por el paciente en la consulta. |                                                                 |

**Tabla 2. Variables fenotípicas.**

| Variable                                                  | Definición                                                                                                                                                                                                                                                                                                                                                                                                                                                                                                                                                            |
|-----------------------------------------------------------|-----------------------------------------------------------------------------------------------------------------------------------------------------------------------------------------------------------------------------------------------------------------------------------------------------------------------------------------------------------------------------------------------------------------------------------------------------------------------------------------------------------------------------------------------------------------------|
| Fototipo                                                  | Capacidad de la piel para asimilar la radiación solar. Definición de Fitzpatrick.                                                                                                                                                                                                                                                                                                                                                                                                                                                                                     |
| Color de pelo                                             | Color natural del pelo                                                                                                                                                                                                                                                                                                                                                                                                                                                                                                                                                |
| Color de ojos                                             | Color natural de los ojos                                                                                                                                                                                                                                                                                                                                                                                                                                                                                                                                             |
| Eférides (Pecas)                                          | Lesiones maculares, puntiformes, múltiples, color marrón claro, agrupadas en cara, tórax superior o brazos. Se categorizó en ausencia o presencia en cantidad significativa o abundante.                                                                                                                                                                                                                                                                                                                                                                              |
| Número de nevus comunes                                   | Tumor benigno melanocítico y de células névicas que genera pigmento en la piel. Lesión mayor de 2 mm. En los pacientes con fotografía corporal total, se tomo de esta ayuda diagnóstica. Los pacientes que no se evaluaron por fotografía corporal total el conteo de nevus correspondió a lo reportado por el dermatólogo en la consulta y la historia clínica únicamente.                                                                                                                                                                                           |
| Número de nevus en tronco y extremidades superiores       | Conteo de nevus (definición previa) en las zonas anatómicas descritas. Se categorizó para mostrar la información de forma que fuera relevante clínicamente.                                                                                                                                                                                                                                                                                                                                                                                                           |
| Patrón dermatoscópico predominante en nevus melanocíticos | Estructuras dermatoscópicas típicas de nevus comunes. Definido por el dermatólogo teniendo en cuenta las estructuras dermatoscópicas encontradas en la mayoría de los nevus melanocíticos adquiridos del paciente y teniendo en cuenta los patrones dermatoscópicos esperados teniendo en cuenta la edad, el género y la localización de los nevus. No existe un número específico de nevus que se haya utilizado para esta definición. Se categorizó teniendo en cuenta los patrones dermatoscópicos descritos en la literatura para nevus melanocíticos adquiridos. |
| Nevus atípicos                                            | Nevus mayores de 5 mm, componente macular y al menos 2 de 3: pigmentación variable, bordes asimétricos o mal definidos. Se categorizaron en más o menos de 5 de estas lesiones.                                                                                                                                                                                                                                                                                                                                                                                       |
| Nevus displásico diagnosticado por patología              | Hallazgos histopatológicos que sugieran nevus displásico o atípico. Se categorizó como presente o ausente.                                                                                                                                                                                                                                                                                                                                                                                                                                                            |
| Nevus melanocítico congénito                              | Nevus originado in útero, visible al nacimiento o poco después. Se categorizó teniendo en cuenta el tamaño del nevus. Clasificación internacional para este tipo de lesiones                                                                                                                                                                                                                                                                                                                                                                                          |

|                                                                                                                                                                             |                                                                                                                                                                                                                                                                                      |
|-----------------------------------------------------------------------------------------------------------------------------------------------------------------------------|--------------------------------------------------------------------------------------------------------------------------------------------------------------------------------------------------------------------------------------------------------------------------------------|
| Fotodaño                                                                                                                                                                    | Indicadores de daño solar o actínico. Presencia de léntigos solares, elastosis solar, queratosis actínicas y/o hipomelanosis gutata.                                                                                                                                                 |
| Léntigos solares                                                                                                                                                            | Indicador de daño solar que aumenta con la edad consistente en máculas redondas de color café oscuro, mayores de 1 cm, distribuidas en zonas fotoexpuestas (cara-pecho-espalda-brazos). Se categorizó teniendo en cuenta el número de zonas anatómicas afectadas por estas lesiones. |
| Queratosis actínicas                                                                                                                                                        | Indicador de daño solar considerada como lesión premaligna. Lesión tipo pápula o placa queratósica localizada en zonas fotoexpuestas, eritematosas o normocrómicas de apariencia rugosa. Se categorizó como presencia de más de 10 o menos de 10 lesiones.                           |
| Antecedente de melanoma                                                                                                                                                     | Historia personal previa de melanoma con confirmación histológica.                                                                                                                                                                                                                   |
| Antecedente de carcinoma basocelular                                                                                                                                        | Historia personal de cáncer de piel tipo carcinoma basocelular con confirmación histológica.                                                                                                                                                                                         |
| Antecedente de carcinoma escamocelular previo                                                                                                                               | Antecedente de cáncer de piel tipo carcinoma escamocelular con confirmación histológica.                                                                                                                                                                                             |
| Antecedente de otro cáncer                                                                                                                                                  | Historia personal de cáncer en otra parte del cuerpo diferente de la piel. No se tuvo en cuenta el tiempo desde el diagnóstico o su relación con el momento del diagnóstico de melanoma                                                                                              |
| Antecedente de inmunosupresión crónica                                                                                                                                      | Inmunosupresión por cualquier causa.                                                                                                                                                                                                                                                 |
| Antecedente de genodermatosis                                                                                                                                               | Historia personal de enfermedad génica que se expresa en la piel.                                                                                                                                                                                                                    |
| Antecedente de enfermedad de Parkinson                                                                                                                                      | Enfermedad de Parkinson diagnosticada por neurología.                                                                                                                                                                                                                                |
| Historia familiar de melanoma                                                                                                                                               | Antecedente de melanoma en algún familiar.                                                                                                                                                                                                                                           |
| * Estas variables se extrajeron del registro de historia clínica en los antecedentes descritos por el paciente y el examen físico realizado y reportado por el dermatólogo. |                                                                                                                                                                                                                                                                                      |

**Tabla 3. Variables de exposición a radiación ultravioleta.**

| Variable                                  | Definición                                                                                                                                |
|-------------------------------------------|-------------------------------------------------------------------------------------------------------------------------------------------|
| Reacción de la piel a la luz solar        | Reacción de la piel a la luz solar cuando hay exposición por más de una hora sin fotoprotección                                           |
| Antecedente de quemadura solar en la vida | Enrojecimiento y molestia de la piel que dura más de 12 horas y aparece luego de la exposición solar                                      |
| Quemadura solar antes de los 20 años      | Enrojecimiento y molestia de la piel que dura más de 12 horas y aparece luego de la exposición solar, con aparición antes de los 20 años. |
| Uso de cámaras bronceadoras               | Uso de cámaras bronceadoras en al menos 1 ocasión.                                                                                        |
| Frecuencia de uso de protector solar      | Frecuencia de uso de protector solar en zonas expuestas al sol.                                                                           |

|                                                                                                                                                  |                                                                                                                |
|--------------------------------------------------------------------------------------------------------------------------------------------------|----------------------------------------------------------------------------------------------------------------|
| Frecuencia de uso de otros métodos de fotoprotección                                                                                             | Protección solar mediante ropa, gafas, sombreros o mantenerse en la sombra.                                    |
| Tipo de fotoprotección física utilizada en la vida                                                                                               | Métodos de fotoprotección física: Sombrero, gafas, ropa, búsqueda de sombra                                    |
| Uso de medidas de fotoprotección antes de los 18 años                                                                                            | Medidas de fotoprotección química y física antes de los 18 años                                                |
| Exposición solar intermitente o permanente (crónica)                                                                                             | Intermitente: vacaciones, fines de semana, deportes al aire libre.<br>Crónica: asociada a la actividad laboral |
| * Estas variables se extrajeron del registro de historia clínica en el interrogatorio dirigido realizado por los dermatólogos de la institución. |                                                                                                                |

**Tabla 4. Variables medidas en las lesiones de melanoma.**

| Variable                               | Definición                                                                                                                                                                                                                                                                                                                                                                |
|----------------------------------------|---------------------------------------------------------------------------------------------------------------------------------------------------------------------------------------------------------------------------------------------------------------------------------------------------------------------------------------------------------------------------|
| Persona que detectó la lesión primaria | Primera persona en advertir sobre la lesión maligna en la piel                                                                                                                                                                                                                                                                                                            |
| Localización anatómica                 | Área anatómica donde se localiza la lesión clínicamente visible                                                                                                                                                                                                                                                                                                           |
| Tamaño de la lesión en mm              | Área de la lesión tumoral clínicamente visible, midiendo el mayor diámetro                                                                                                                                                                                                                                                                                                |
| Síntomas                               | Molestias físicas que genera la lesión tumoral                                                                                                                                                                                                                                                                                                                            |
| Estructuras dermatoscópicas presentes  | Estructuras dermatoscópicas típicas de melanoma. Se evalúa la presencia o ausencia de red atípica, red de pigmento negativa, proyecciones periféricas, puntos y glóbulos atípicos, mancha de pigmento atípica, áreas periféricas sin estructura, velo azul-blanquecino y estructuras blanco-brillantes según la definición de la sociedad internacional de dermatoscopia. |
| Estadaje                               | Estadio según guías NCCN 2016. Guías disponibles en el momento en que se desarrolló el estudio.                                                                                                                                                                                                                                                                           |
| Tratamiento                            | Tratamiento recibido o planeado para el paciente                                                                                                                                                                                                                                                                                                                          |

**Tabla 5. Variables histológicas de melanoma.**

| Variable                          | Definición                                                                                                                                                     |
|-----------------------------------|----------------------------------------------------------------------------------------------------------------------------------------------------------------|
| Subtipo histológico               | Configuración morfológica del melanoma.                                                                                                                        |
| Espesor del tumor en mm (Breslow) | Medición del espesor tumoral en milímetros.                                                                                                                    |
| Fase de crecimiento               | Fase o estadio de crecimiento tumoral de forma radial (horizontal) o vertical.                                                                                 |
| Mitosis                           | Actividad mitótica del melanoma, reportada como número de mitosis por milímetro cuadrado (mm <sup>2</sup> ).                                                   |
| Ulceración                        | Ausencia de epitelio intacto sobre el melanoma.                                                                                                                |
| Regresión                         | Área del tumor que disminuye o desaparece y es sustituido progresivamente por fibrosis, con cantidad variable de melanófagos, linfocitos y neovascularización. |
| Márgenes quirúrgicos              | Compromiso o no de márgenes quirúrgicos por histopatología.                                                                                                    |
| Invasión linfovascular            | Presencia de células tumorales en la pared del vaso o en su interior.                                                                                          |

|                     |                                                                                                                                                                                 |
|---------------------|---------------------------------------------------------------------------------------------------------------------------------------------------------------------------------|
| Invasión perineural | Presencia de células tumorales en la vaina que recubre un nervio.                                                                                                               |
| Microsatélites      | Presencia de nidos tumorales > 0.5mm de diámetro en la dermis reticular, panículo o vasos, debajo del tumor invasor, pero separado de el por al menos 0.3 mm del tejido normal. |

### Anexo 3.

**Tabla 1**

#### **Estudios que evalúan factores de riesgo para melanoma en Latino América y España.**

| Estudio/<br>País                                                                 | Diseño del estudio                         | n=      | Mujer/<br>hombre con<br>melanoma<br>(n/ %) | Etnia                                    | Localización más frecuente | Factores de riesgo principales y estadísticamente significativos                                           | Subtipo histológico principal | Comentarios                                                                |
|----------------------------------------------------------------------------------|--------------------------------------------|---------|--------------------------------------------|------------------------------------------|----------------------------|------------------------------------------------------------------------------------------------------------|-------------------------------|----------------------------------------------------------------------------|
| Loria D, Matos E.<br>Int J Dermatol.<br>2001Feb;40(2):108-14.<br><br>(Argentina) | Casos y controles                          | 101/246 | 46/55                                      | Hispanos                                 | tronco                     | Nevus >40 en miembros superiores, quemadura solar, piel clara, ojos claros, exposición solar recreacional. | MES* 44 (43%)                 | Exposición solar ocupacional/ crónica no se encontró asociación            |
| Ruiz Lascano et al. Medicina (B Aires).<br>2004;64(6):504-8.<br><br>(Argentina)  | Casos y controles                          | 65/195  | 30/35                                      | Hispanos                                 | tronco                     | Abuelos europeos, piel clara, quemadura solar, antecedente familiar de melanoma                            | MES 27 (41%)                  |                                                                            |
| Luiz OC, et al. PLoS One.<br>2012;7(4):e36348<br><br>(Brazil)                    | Casos y controles                          | 202/22  | 100/102                                    | Blancos                                  | No descrito                | Acestros europeos, ojos claros, no uso de fotoprotección, quemaduras solares severas                       | No descrito                   | Todos pacientes hospitalizados residentes en área urbana                   |
| Quintella Mendes GL, et al. Melanoma Res.<br>2013 Jun;23(3):199-205.<br>(Brazil) | Observacional retrospectivo o tipo cohorte | 1083    | 524/559                                    | Blancos<br>87.2%/<br>No blancos<br>12.5% | tronco                     | Nivel educativo alto muestra mejor supervivencia global y libre de recaída                                 | MES 594 (54.8%)               | Nivel educativo alto muestra mejor supervivencia global y libre de recaída |

|                                                                          |                           |         |         |                  |                           |                                                                                                              |                       |                                                                    |
|--------------------------------------------------------------------------|---------------------------|---------|---------|------------------|---------------------------|--------------------------------------------------------------------------------------------------------------|-----------------------|--------------------------------------------------------------------|
| Ballester I et al. Actas Dermosifiliogr. 2012 Nov;103(9):790-7. (España) | Casos y controles         | 242/173 | 114/128 | Valencia, España | No descrito               | Pelo rubio/rojo, múltiples nevus melanocíticos, fototipo I-II, queratosis actínicas, antecedente de CPNM***. | No descrito           | No incluyó melanoma acral                                          |
| Brandão FV et al. An Bras Dermatol. 2013 May-Jun;88(3):344-53 (Brazil)   | Observacional descriptivo | 166     | 101/65  | Caucásicos 74%   | Cabeza y cuello 30.7%     | Hombres, no caucásicos, menores de 20 años, breslow > 2mm                                                    | Léntigo maligno 35.7% |                                                                    |
| Reyes et al. Int J Dermatol. 2018 Jan;57(1):21-27. (Colombia)            | Observacional descriptivo | 169     | 96/73   | Hispanos         | Miembros inferiores 42.6% | Régimen subsidiado de seguridad social                                                                       | MN** 41 (24.3%)       | Todos los pacientes con melanoma invasor                           |
| Aguirre et al (Colombia)                                                 | Casos y controles         |         | 62/125  | Hispanos         | Extremidades 39%          | Antecedente de quemadura solar y exposición solar recreativa                                                 | MES 34%               | Factor protector el uso de 2 o más medias de fotoprotección física |

\*MES: melanoma de extensión superficial. \*\* MN: melanoma nodular. \*\*\* CPNM: cáncer de piel no melanoma.

En esta tabla se describen estudios que evalúan factores de riesgo similar a los analizados en nuestro estudio, la mayoría de ellos de población Latinoamericana de etnia hispana y no hispana, excepto uno realizado en Valencia, España

**Tabla 2.**

**Factores de riesgo en población no latinoamericana comparado con los hallazgos del presente estudio.**

| <b>Hallazgos en otros estudios</b>                                                                                                                                                                           |                         | <b>Aguirre et al.</b> |                |
|--------------------------------------------------------------------------------------------------------------------------------------------------------------------------------------------------------------|-------------------------|-----------------------|----------------|
| <b>FR Población no latinoamericana</b>                                                                                                                                                                       | <b>RR o OR (IC 95%)</b> | <b>OR (IC 95%)</b>    | <b>n = (%)</b> |
| <b>Fenotipos claros</b><br>Gandini S, et al. Meta-analysis of risk factors for cutaneous melanoma: III. Family history, actinic damage and phenotypic factors. Eur J Cancer. 2005 Sep;41(14):2040-59.        | 2.99 (1.75-5.12 )       | 1.16 (0.43 -3.07)     | 44 (23 %)      |
| <b>Nevus &gt; 100</b><br>Gandini S, et al. Meta analysis of risk factors for cutaneous melanoma: I. Common and atypical naevi. Eur J Cancer. 2005 Jan;41(1):28-44.                                           | 6.89 (4-63-10.25)       | 1.71 (0.61 – 4.84)    | 38 (20 %)      |
| <b>N. displásicos &gt; 5</b><br>Gandini S, et al. Meta analysis of risk factors for cutaneous melanoma: I. Common and atypical naevi. Eur J Cancer. 2005 Jan;41(1):28-44.                                    | 6.36 (3.80- 10.33)      | 2.56 (1.14 – 5.73)    | 33 (17 %)      |
| <b>Antecedente de Melanoma</b><br>Gandini S, et al. Meta-analysis of risk factors for cutaneous melanoma: III. Family history, actinic damage and phenotypic factors. Eur J Cancer. 2005 Sep;41(14):2040-59. | 1.74 (1.41, 2.14)       | 3.74 (0.77-0.49)      | 10 (5 %)       |



|                                                                                                                                                                                                            |                   |                      |           |
|------------------------------------------------------------------------------------------------------------------------------------------------------------------------------------------------------------|-------------------|----------------------|-----------|
| <b>Antecedente de CPNM *</b><br>Gandini S, et al. Meta-analysis of risk factors for cutaneous melanoma: III. Family history, actinic damage and phenotypic factors. Eur J Cancer. 2005 Sep;41(14):2040-59. | 4.28 (2.08-6.55)  | 1,36 (0,371 – 5,037) | 29 /15 %) |
| <b>Antecedente Familiar 1º de melanoma</b><br>Olsen CM, et al. Familial melanoma: a meta-analysis and estimates of attributable fraction. Cancer Epidemiol Biomarkers Prev. 2010 Jan;19(1):65-73.          | 2.06 (1.72-2.45 ) | 1.77 (0.51- 6.09)    | 24 (13 %) |
| <b>Exposición RUV recreacional</b><br>Gandini S, et al. Meta-analysis of risk factors for cutaneous melanoma: II. Sun exposure. Eur J Cancer. 2005 Jan;41(1):45-60.                                        | 1.61 (1.31-1.99)  | 4.17 (1.82-9.57)     | 73 (39 %) |
| <b>Quemaduras solares en la infancia</b><br>Gandini S, et al. Meta-analysis of risk factors for cutaneous melanoma: II. Sun exposure. Eur J Cancer. 2005 Jan;41(1):45-60.                                  | 2.24 (1.73- 2.89) | 2.68 (1,32 – 5.45)   | 28 (15 %) |
| *CPNM: Cáncer de piel no melanoma                                                                                                                                                                          |                   |                      |           |
